# Supplementary material
Source: Springer Nature journal article supplement (https://www.springermedizin.de/resource/supplementary/13054_2012_1683_MOESM1_ESM.pdf/9711258)

**A**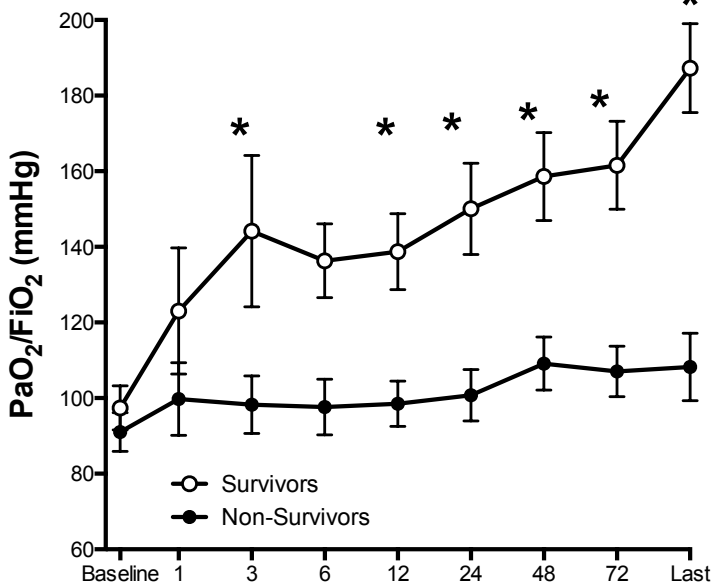**B**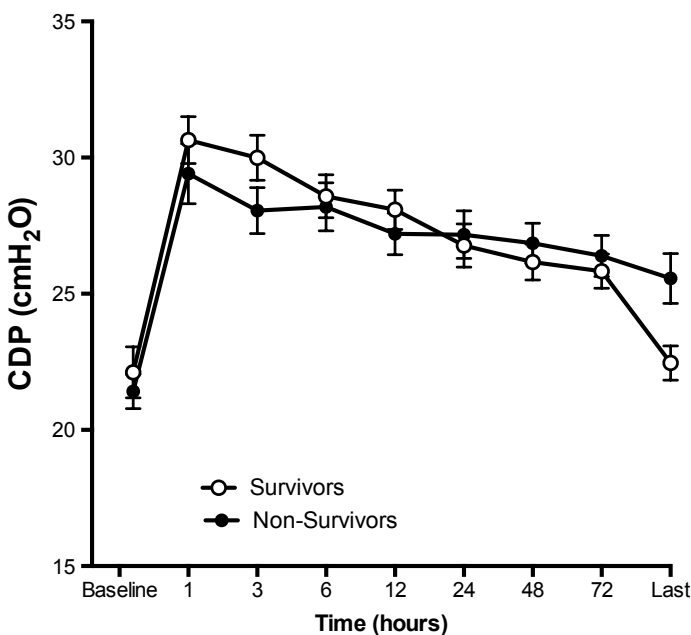**C**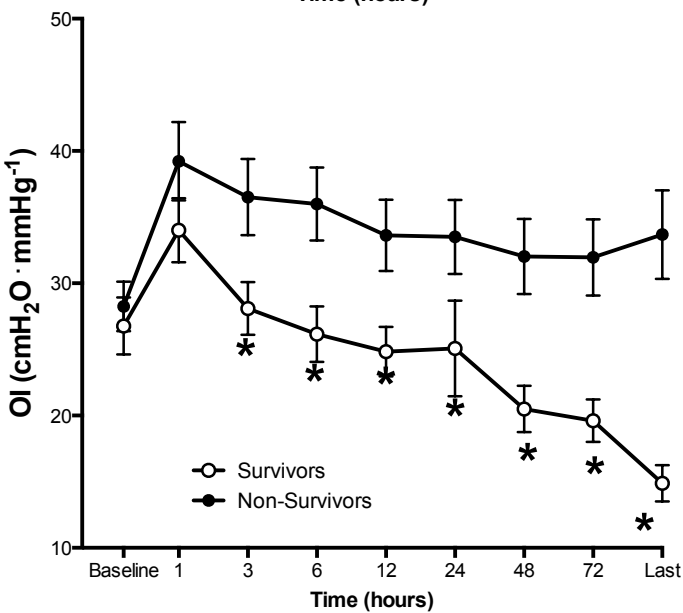

Supplement: MOESM1 [file 9711258]
